# Supplementary material for: The potential key genes within focal adhesion that regulate mesenchymal stem cells osteogenesis or adipogenesis in microgravity related disuse osteoporosis: an integrated analysis
Source: Front Endocrinol (Lausanne). 2025 Mar 10;16:1469400. doi: 10.3389/fendo.2025.1469400 (PMC11930814; doi:10.3389/fendo.2025.1469400)
Supplement: Supplementary file 4 [file Table3.xlsx]

## Sheet: Supplementary Table 3
Supplementary Table 3： KEGG enrichment analysis of 203 focal adhesion-related genes
	category	subcategory	ID	Description	GeneRatio	BgRatio	pvalue	p.adjust	qvalue	geneID	Count	richFactor
1	Cellular Processes	Cellular community - eukaryotes	hsa04510	Focal adhesion	201/202	203/8536	0	0	0	ACTB/ACTG1/ACTN1/ACTN4/AKT1/AKT2/AKT3/ARHGAP35/ARHGAP5/BAD/BCAR1/BCL2/BIRC2/BIRC3/BRAF/BUB1B-PAK6/CAPN2/CAV1/CAV2/CAV3/CCND1/CCND2/CCND3/CDC42/CHAD/COL1A1/COL1A2/COL2A1/COL4A1/COL4A2/COL4A3/COL4A4/COL4A5/COL4A6/COL6A1/COL6A2/COL6A3/COL6A5/COL6A6/COL9A1/COL9A2/COL9A3/COMP/CRK/CRKL/CTNNB1/DIAPH1/DOCK1/EGF/EGFR/ELK1/EMP1/EMP2/ERBB2/FLNA/FLNB/FLT1/FLT4/FN1/FYN/GRB2/GSK3B/HGF/HRAS/IBSP/IGF1/IGF1R/ILK/…	201	0.990147783251232
2	Environmental Information Processing	Signal transduction	hsa04151	PI3K-Akt signaling pathway	114/202	362/8536	7.25830647459242e-108	7.36718107171131e-106	1.33705645584597e-106	AKT1/AKT2/AKT3/BAD/BCL2/CCND1/CCND2/CCND3/CHAD/COL1A1/COL1A2/COL2A1/COL4A1/COL4A2/COL4A3/COL4A4/COL4A5/COL4A6/COL6A1/COL6A2/COL6A3/COL6A5/COL6A6/COL9A1/COL9A2/COL9A3/COMP/EGF/EGFR/ERBB2/FLT1/FLT4/FN1/GRB2/GSK3B/HGF/HRAS/IBSP/IGF1/IGF1R/ITGA1/ITGA10/ITGA11/ITGA2/ITGA2B/ITGA3/ITGA4/ITGA5/ITGA6/ITGA7/ITGA8/ITGA9/ITGAV/ITGB1/ITGB3/ITGB4/ITGB5/ITGB6/ITGB7/ITGB8/KDR/LAMA1/LAMA2/LAMA3/LAMA4/LAMA5/LAMB1/…	114	0.314917127071823
3	Cellular Processes	Cell motility	hsa04810	Regulation of actin cytoskeleton	97/202	232/8536	7.09915821897627e-104	4.80376372817395e-102	8.71826447944455e-103	ACTB/ACTG1/ACTN1/ACTN4/AKT1/AKT2/AKT3/ARHGAP35/BCAR1/BRAF/BUB1B-PAK6/CDC42/CRK/CRKL/DIAPH1/DOCK1/EGF/EGFR/FN1/HRAS/ITGA1/ITGA10/ITGA11/ITGA2/ITGA2B/ITGA3/ITGA4/ITGA5/ITGA6/ITGA7/ITGA8/ITGA9/ITGAV/ITGB1/ITGB3/ITGB4/ITGB5/ITGB6/ITGB7/ITGB8/MAP2K1/MAPK1/MAPK3/MYL10/MYL12A/MYL12B/MYL2/MYL5/MYL7/MYL9/MYLK/MYLK2/MYLK3/MYLK4/PAK1/PAK2/PAK3/PAK4/PAK5/PAK6/PDGFA/PDGFB/PDGFC/PDGFD/PDGFRA/PDGFRB/PIK3CA/PIK3…	97	0.418103448275862
5	Human Diseases	Infectious disease: viral	hsa05165	Human papillomavirus infection	96/202	333/8536	3.28775886216079e-84	1.33483009803728e-82	2.42255916159216e-83	AKT1/AKT2/AKT3/BAD/CCND1/CCND2/CCND3/CDC42/CHAD/COL1A1/COL1A2/COL2A1/COL4A1/COL4A2/COL4A3/COL4A4/COL4A5/COL4A6/COL6A1/COL6A2/COL6A3/COL6A5/COL6A6/COL9A1/COL9A2/COL9A3/COMP/CTNNB1/EGF/EGFR/FN1/GRB2/GSK3B/HRAS/IBSP/ITGA1/ITGA10/ITGA11/ITGA2/ITGA2B/ITGA3/ITGA4/ITGA5/ITGA6/ITGA7/ITGA8/ITGA9/ITGAV/ITGB1/ITGB3/ITGB4/ITGB5/ITGB6/ITGB7/ITGB8/LAMA1/LAMA2/LAMA3/LAMA4/LAMA5/LAMB1/LAMB2/LAMB3/LAMB4/LAMC1/LAM…	96	0.288288288288288
6	Human Diseases	Cancer: overview	hsa05205	Proteoglycans in cancer	68/202	204/8536	1.68274839580002e-62	5.6932987391234e-61	1.03326655882457e-61	ACTB/ACTG1/AKT1/AKT2/AKT3/BRAF/CAV1/CAV2/CAV3/CCND1/CDC42/COL1A1/COL1A2/CTNNB1/EGFR/ELK1/ERBB2/FLNA/FN1/GRB2/HGF/HRAS/IGF1/IGF1R/ITGA2/ITGA5/ITGAV/ITGB1/ITGB3/ITGB5/KDR/MAP2K1/MAPK1/MAPK3/MET/PAK1/PDPK1/PIK3CA/PIK3CB/PIK3CD/PIK3R1/PIK3R2/PIK3R3/PPP1CA/PPP1CB/PPP1CC/PPP1R12A/PPP1R12B/PPP1R12C/PRKCA/PRKCB/PRKCG/PTK2/PXN/RAC1/RAF1/RHOA/ROCK1/ROCK2/SOS1/SOS2/SRC/THBS1/VAV1/VAV2/VAV3/VEGFA/VTN	68	0.333333333333333
4	Environmental Information Processing	Signaling molecules and interaction	hsa04512	ECM-receptor interaction	65/202	89/8536	5.26006753229317e-90	2.66948427263878e-88	4.8447990429016e-89	CHAD/COL1A1/COL1A2/COL2A1/COL4A1/COL4A2/COL4A3/COL4A4/COL4A5/COL4A6/COL6A1/COL6A2/COL6A3/COL6A5/COL6A6/COL9A1/COL9A2/COL9A3/COMP/FN1/IBSP/ITGA1/ITGA10/ITGA11/ITGA2/ITGA2B/ITGA3/ITGA4/ITGA5/ITGA6/ITGA7/ITGA8/ITGA9/ITGAV/ITGB1/ITGB3/ITGB4/ITGB5/ITGB6/ITGB7/ITGB8/LAMA1/LAMA2/LAMA3/LAMA4/LAMA5/LAMB1/LAMB2/LAMB3/LAMB4/LAMC1/LAMC2/LAMC3/RELN/SPP1/THBS1/THBS2/THBS3/THBS4/TNC/TNN/TNR/TNXB/VTN/VWF	65	0.730337078651685
10	Environmental Information Processing	Signal transduction	hsa04014	Ras signaling pathway	64/202	238/8536	7.47381552712826e-52	1.51718455200704e-50	2.75351098367883e-51	AKT1/AKT2/AKT3/BAD/BUB1B-PAK6/CDC42/EGF/EGFR/ELK1/FLT1/FLT4/GRB2/HGF/HRAS/IGF1/IGF1R/KDR/MAP2K1/MAPK1/MAPK10/MAPK3/MAPK8/MAPK9/MET/PAK1/PAK2/PAK3/PAK4/PAK5/PAK6/PDGFA/PDGFB/PDGFC/PDGFD/PDGFRA/PDGFRB/PGF/PIK3CA/PIK3CB/PIK3CD/PIK3R1/PIK3R2/PIK3R3/PRKCA/PRKCB/PRKCG/RAC1/RAC2/RAC3/RAF1/RAP1A/RAP1B/RASGRF1/RHOA/SHC1/SHC2/SHC3/SHC4/SOS1/SOS2/VEGFA/VEGFB/VEGFC/VEGFD	64	0.26890756302521
7	Environmental Information Processing	Signal transduction	hsa04015	Rap1 signaling pathway	63/202	212/8536	4.87282574577444e-54	1.41311946627459e-52	2.56464512935497e-53	ACTB/ACTG1/AKT1/AKT2/AKT3/BCAR1/BRAF/CDC42/CRK/CRKL/CTNNB1/EGF/EGFR/FLT1/FLT4/HGF/HRAS/IGF1/IGF1R/ITGA2B/ITGB1/ITGB3/KDR/MAP2K1/MAPK1/MAPK3/MET/PDGFA/PDGFB/PDGFC/PDGFD/PDGFRA/PDGFRB/PGF/PIK3CA/PIK3CB/PIK3CD/PIK3R1/PIK3R2/PIK3R3/PRKCA/PRKCB/PRKCG/RAC1/RAC2/RAC3/RAF1/RAP1A/RAP1B/RAPGEF1/RHOA/SRC/THBS1/TLN1/TLN2/VASP/VAV1/VAV2/VAV3/VEGFA/VEGFB/VEGFC/VEGFD	63	0.297169811320755
13	NA	NA	hsa04820	Cytoskeleton in muscle cells	56/202	232/8536	3.29162155908054e-42	5.13999366533345e-41	9.32848215124039e-42	ACTB/ACTG1/COL1A1/COL1A2/COL4A1/COL4A2/COL4A3/COL4A4/COL4A5/COL4A6/COL6A1/COL6A2/COL6A3/COL6A5/COL6A6/COL9A1/COL9A2/COL9A3/COMP/DIAPH1/FLNC/FN1/ITGA1/ITGA10/ITGA11/ITGA2/ITGA2B/ITGA3/ITGA4/ITGA5/ITGA6/ITGA7/ITGA8/ITGA9/ITGAV/ITGB1/ITGB3/ITGB4/ITGB5/ITGB6/ITGB7/ITGB8/LAMA1/LAMA2/MYL2/MYL5/MYL7/MYL9/THBS1/THBS2/THBS3/THBS4/TLN1/TLN2/VCL/ZYX	56	0.241379310344828
24	Environmental Information Processing	Signal transduction	hsa04010	MAPK signaling pathway	53/202	300/8536	1.91048875204892e-32	1.61595506944138e-31	2.93276782112773e-32	AKT1/AKT2/AKT3/BRAF/CDC42/CRK/CRKL/EGF/EGFR/ELK1/ERBB2/FLNA/FLT1/FLT4/GRB2/HGF/HRAS/IGF1/IGF1R/JUN/KDR/MAP2K1/MAPK1/MAPK10/MAPK3/MAPK8/MAPK9/MET/PAK1/PAK2/PDGFA/PDGFB/PDGFC/PDGFD/PDGFRA/PDGFRB/PGF/PRKCA/PRKCB/PRKCG/RAC1/RAC2/RAC3/RAF1/RAP1A/RAP1B/RASGRF1/SOS1/SOS2/VEGFA/VEGFB/VEGFC/VEGFD	53	0.176666666666667
27	Human Diseases	Infectious disease: bacterial	hsa05131	Shigellosis	49/202	250/8536	3.83473928629137e-32	2.88315583376721e-31	5.23258772008569e-32	ACTB/ACTG1/ACTN1/ACTN4/AKT1/AKT2/AKT3/BCAR1/BCL2/CAPN2/CDC42/CRK/CRKL/DIAPH1/DOCK1/EGFR/GSK3B/ILK/ITGA5/ITGB1/JUN/MAPK1/MAPK10/MAPK3/MAPK8/MAPK9/MYL10/MYL12A/MYL12B/MYL2/MYL5/MYL7/MYL9/PIK3CA/PIK3CB/PIK3CD/PIK3R1/PIK3R2/PIK3R3/PTK2/PXN/RAC1/RHOA/ROCK1/ROCK2/SRC/TLN1/TLN2/VCL	49	0.196
9	Environmental Information Processing	Signal transduction	hsa04012	ErbB signaling pathway	46/202	86/8536	1.83347315395535e-53	4.13550055836596e-52	7.50544565946636e-53	AKT1/AKT2/AKT3/BAD/BRAF/BUB1B-PAK6/CRK/CRKL/EGF/EGFR/ELK1/ERBB2/GRB2/GSK3B/HRAS/JUN/MAP2K1/MAPK1/MAPK10/MAPK3/MAPK8/MAPK9/PAK1/PAK2/PAK3/PAK4/PAK5/PAK6/PIK3CA/PIK3CB/PIK3CD/PIK3R1/PIK3R2/PIK3R3/PRKCA/PRKCB/PRKCG/PTK2/RAF1/SHC1/SHC2/SHC3/SHC4/SOS1/SOS2/SRC	46	0.534883720930233
8	Human Diseases	Drug resistance: antineoplastic	hsa01521	EGFR tyrosine kinase inhibitor resistance	45/202	80/8536	1.16111376887432e-53	2.9463261885186e-52	5.34723446192123e-53	AKT1/AKT2/AKT3/BAD/BCL2/BRAF/EGF/EGFR/ERBB2/GRB2/GSK3B/HGF/HRAS/IGF1/IGF1R/KDR/MAP2K1/MAPK1/MAPK3/MET/PDGFA/PDGFB/PDGFC/PDGFD/PDGFRA/PDGFRB/PIK3CA/PIK3CB/PIK3CD/PIK3R1/PIK3R2/PIK3R3/PRKCA/PRKCB/PRKCG/PTEN/RAF1/SHC1/SHC2/SHC3/SHC4/SOS1/SOS2/SRC/VEGFA	45	0.5625
29	Organismal Systems	Immune system	hsa04062	Chemokine signaling pathway	44/202	193/8536	8.77754919679535e-32	6.14428443775674e-31	1.11511514296856e-31	AKT1/AKT2/AKT3/BAD/BCAR1/BRAF/CDC42/CRK/CRKL/GRB2/GSK3B/HRAS/MAP2K1/MAPK1/MAPK3/PAK1/PIK3CA/PIK3CB/PIK3CD/PIK3R1/PIK3R2/PIK3R3/PRKCB/PTK2/PXN/RAC1/RAC2/RAC3/RAF1/RAP1A/RAP1B/RHOA/ROCK1/ROCK2/SHC1/SHC2/SHC3/SHC4/SOS1/SOS2/SRC/VAV1/VAV2/VAV3	44	0.227979274611399
17	Human Diseases	Infectious disease: bacterial	hsa05135	Yersinia infection	43/202	138/8536	2.07604525820528e-37	2.47904227891572e-36	4.49916929022817e-37	ACTB/ACTG1/AKT1/AKT2/AKT3/BCAR1/CDC42/CRK/CRKL/DOCK1/FN1/GSK3B/ITGA4/ITGA5/ITGB1/JUN/MAP2K1/MAPK1/MAPK10/MAPK3/MAPK8/MAPK9/PIK3CA/PIK3CB/PIK3CD/PIK3R1/PIK3R2/PIK3R3/PIP5K1A/PIP5K1B/PIP5K1C/PTK2/PXN/RAC1/RAC2/RAC3/RHOA/ROCK1/ROCK2/SRC/VAV1/VAV2/VAV3	43	0.311594202898551
53	Human Diseases	Cancer: overview	hsa05206	MicroRNAs in cancer	43/202	312/8536	9.98048771137254e-22	3.82271510454458e-21	6.93777695924606e-22	BCL2/CCND1/CCND2/CRK/CRKL/EGFR/ERBB2/GRB2/HRAS/ITGA5/ITGB3/MAP2K1/MAPK1/MAPK3/MET/PAK4/PDGFA/PDGFB/PDGFRA/PDGFRB/PIK3CA/PIK3CB/PIK3CD/PIK3R1/PIK3R2/PIK3R3/PRKCA/PRKCB/PRKCG/PTEN/RAF1/RHOA/ROCK1/SHC1/SHC4/SOS1/SOS2/THBS1/TNC/TNN/TNR/TNXB/VEGFA	43	0.137820512820513
12	Human Diseases	Cancer: specific types	hsa05222	Small cell lung cancer	41/202	93/8536	4.95242070219236e-43	8.37784502120875e-42	1.52048004014678e-42	AKT1/AKT2/AKT3/BCL2/BIRC2/BIRC3/CCND1/COL4A1/COL4A2/COL4A3/COL4A4/COL4A5/COL4A6/FN1/ITGA2/ITGA2B/ITGA3/ITGA6/ITGAV/ITGB1/LAMA1/LAMA2/LAMA3/LAMA4/LAMA5/LAMB1/LAMB2/LAMB3/LAMB4/LAMC1/LAMC2/LAMC3/PIK3CA/PIK3CB/PIK3CD/PIK3R1/PIK3R2/PIK3R3/PTEN/PTK2/XIAP	41	0.440860215053763
15	Organismal Systems	Immune system	hsa04670	Leukocyte transendothelial migration	41/202	116/8536	3.06499457830469e-38	4.14795932930568e-37	7.52805685899397e-38	ACTB/ACTG1/ACTN1/ACTN4/ARHGAP35/ARHGAP5/BCAR1/CDC42/CTNNB1/ITGA4/ITGB1/MYL10/MYL12A/MYL12B/MYL2/MYL5/MYL7/MYL9/PIK3CA/PIK3CB/PIK3CD/PIK3R1/PIK3R2/PIK3R3/PRKCA/PRKCB/PRKCG/PTK2/PXN/RAC1/RAC2/RAP1A/RAP1B/RHOA/ROCK1/ROCK2/VASP/VAV1/VAV2/VAV3/VCL	41	0.353448275862069
18	Organismal Systems	Immune system	hsa04611	Platelet activation	41/202	126/8536	1.56316362973614e-36	1.76290120464687e-35	3.19945772168216e-36	ACTB/ACTG1/AKT1/AKT2/AKT3/ARHGAP35/COL1A1/COL1A2/FYN/ITGA2/ITGA2B/ITGB1/ITGB3/MAPK1/MAPK3/MYL12A/MYL12B/MYLK/MYLK2/MYLK3/MYLK4/PIK3CA/PIK3CB/PIK3CD/PIK3R1/PIK3R2/PIK3R3/PPP1CA/PPP1CB/PPP1CC/PPP1R12A/RAP1A/RAP1B/RHOA/ROCK1/ROCK2/SRC/TLN1/TLN2/VASP/VWF	41	0.325396825396825
43	Human Diseases	Infectious disease: viral	hsa05163	Human cytomegalovirus infection	41/202	226/8536	1.9283658404281e-25	9.10368059550942e-25	1.65221063439373e-25	AKT1/AKT2/AKT3/BCAR1/CCND1/CRK/CRKL/CTNNB1/EGFR/ELK1/GRB2/GSK3B/HRAS/ITGAV/ITGB3/MAP2K1/MAPK1/MAPK3/PDGFRA/PIK3CA/PIK3CB/PIK3CD/PIK3R1/PIK3R2/PIK3R3/PRKCA/PRKCB/PRKCG/PTK2/PXN/RAC1/RAC2/RAC3/RAF1/RHOA/ROCK1/ROCK2/SOS1/SOS2/SRC/VEGFA	41	0.18141592920354
19	Organismal Systems	Endocrine system	hsa04926	Relaxin signaling pathway	40/202	130/8536	1.56651290096854e-34	1.67369536261375e-33	3.03755964176725e-34	AKT1/AKT2/AKT3/COL1A1/COL1A2/COL4A1/COL4A2/COL4A3/COL4A4/COL4A5/COL4A6/EGFR/GRB2/HRAS/JUN/MAP2K1/MAPK1/MAPK10/MAPK3/MAPK8/MAPK9/PIK3CA/PIK3CB/PIK3CD/PIK3R1/PIK3R2/PIK3R3/PRKCA/RAF1/SHC1/SHC2/SHC3/SHC4/SOS1/SOS2/SRC/VEGFA/VEGFB/VEGFC/VEGFD	40	0.307692307692308
14	Human Diseases	Cancer: overview	hsa05231	Choline metabolism in cancer	39/202	99/8536	1.47581598383235e-38	2.13993317655691e-37	3.88372627324302e-38	AKT1/AKT2/AKT3/EGF/EGFR/GRB2/HRAS/JUN/MAP2K1/MAPK1/MAPK10/MAPK3/MAPK8/MAPK9/PDGFA/PDGFB/PDGFC/PDGFD/PDGFRA/PDGFRB/PDPK1/PIK3CA/PIK3CB/PIK3CD/PIK3R1/PIK3R2/PIK3R3/PIP5K1A/PIP5K1B/PIP5K1C/PRKCA/PRKCB/PRKCG/RAC1/RAC2/RAC3/RAF1/SOS1/SOS2	39	0.393939393939394
11	Human Diseases	Cancer: specific types	hsa05211	Renal cell carcinoma	38/202	70/8536	2.05228681253473e-44	3.78740202676864e-43	6.8736878888723e-44	AKT1/AKT2/AKT3/BAD/BRAF/BUB1B-PAK6/CDC42/CRK/CRKL/GRB2/HGF/HRAS/JUN/MAP2K1/MAPK1/MAPK3/MET/PAK1/PAK2/PAK3/PAK4/PAK5/PAK6/PDGFB/PIK3CA/PIK3CB/PIK3CD/PIK3R1/PIK3R2/PIK3R3/RAC1/RAF1/RAP1A/RAP1B/RAPGEF1/SOS1/SOS2/VEGFA	38	0.542857142857143
22	Organismal Systems	Nervous system	hsa04722	Neurotrophin signaling pathway	38/202	120/8536	2.44208172479054e-33	2.25337540969309e-32	4.0896105439076e-33	AKT1/AKT2/AKT3/BAD/BCL2/BRAF/CDC42/CRK/CRKL/GRB2/GSK3B/HRAS/JUN/MAP2K1/MAPK1/MAPK10/MAPK3/MAPK8/MAPK9/PDPK1/PIK3CA/PIK3CB/PIK3CD/PIK3R1/PIK3R2/PIK3R3/RAC1/RAF1/RAP1A/RAP1B/RAPGEF1/RHOA/SHC1/SHC2/SHC3/SHC4/SOS1/SOS2	38	0.316666666666667
40	Human Diseases	Cancer: specific types	hsa05225	Hepatocellular carcinoma	37/202	170/8536	6.14511256950619e-26	3.11864462902439e-25	5.65997210349255e-26	ACTB/ACTG1/AKT1/AKT2/AKT3/BAD/BRAF/CCND1/CTNNB1/EGFR/ELK1/GRB2/GSK3B/HGF/HRAS/IGF1R/MAP2K1/MAPK1/MAPK3/MET/PIK3CA/PIK3CB/PIK3CD/PIK3R1/PIK3R2/PIK3R3/PRKCA/PRKCB/PRKCG/PTEN/RAF1/SHC1/SHC2/SHC3/SHC4/SOS1/SOS2	37	0.217647058823529
45	Organismal Systems	Development and regeneration	hsa04360	Axon guidance	37/202	184/8536	1.23903037644825e-24	5.58940369819987e-24	1.01441083451903e-24	BUB1B-PAK6/CDC42/FYN/GSK3B/HRAS/ILK/ITGB1/MAPK1/MAPK3/MET/MYL12A/MYL12B/MYL5/MYL9/PAK1/PAK2/PAK3/PAK4/PAK5/PAK6/PDPK1/PIK3CA/PIK3CB/PIK3CD/PIK3R1/PIK3R2/PIK3R3/PRKCA/PTK2/RAC1/RAC2/RAC3/RAF1/RHOA/ROCK1/ROCK2/SRC	37	0.201086956521739
51	Human Diseases	Infectious disease: viral	hsa05170	Human immunodeficiency virus 1 infection	37/202	213/8536	2.78774504397742e-22	1.10963185083807e-21	2.01385090896202e-22	AKT1/AKT2/AKT3/BAD/BCL2/BUB1B-PAK6/CRK/CRKL/HRAS/JUN/MAP2K1/MAPK1/MAPK10/MAPK3/MAPK8/MAPK9/PAK1/PAK2/PAK3/PAK4/PAK5/PAK6/PIK3CA/PIK3CB/PIK3CD/PIK3R1/PIK3R2/PIK3R3/PRKCA/PRKCB/PRKCG/PTK2/PXN/RAC1/RAC2/RAC3/RAF1	37	0.173708920187793
20	Human Diseases	Cancer: specific types	hsa05215	Prostate cancer	36/202	98/8536	2.79080308063177e-34	2.83266512684125e-33	5.14095304326905e-34	AKT1/AKT2/AKT3/BAD/BCL2/BRAF/CCND1/CTNNB1/EGF/EGFR/ERBB2/GRB2/GSK3B/HRAS/IGF1/IGF1R/MAP2K1/MAPK1/MAPK3/PDGFA/PDGFB/PDGFC/PDGFD/PDGFRA/PDGFRB/PDPK1/PIK3CA/PIK3CB/PIK3CD/PIK3R1/PIK3R2/PIK3R3/PTEN/RAF1/SOS1/SOS2	36	0.36734693877551
21	Human Diseases	Endocrine and metabolic disease	hsa04933	AGE-RAGE signaling pathway in diabetic complications	36/202	101/8536	1.00484051396756e-33	9.71345830168646e-33	1.76287809467994e-33	AKT1/AKT2/AKT3/BCL2/CCND1/CDC42/COL1A1/COL1A2/COL4A1/COL4A2/COL4A3/COL4A4/COL4A5/COL4A6/DIAPH1/FN1/HRAS/JUN/MAPK1/MAPK10/MAPK3/MAPK8/MAPK9/PIK3CA/PIK3CB/PIK3CD/PIK3R1/PIK3R2/PIK3R3/PRKCA/PRKCB/RAC1/VEGFA/VEGFB/VEGFC/VEGFD	36	0.356435643564356
32	Organismal Systems	Immune system	hsa04660	T cell receptor signaling pathway	36/202	122/8536	2.38805239783013e-30	1.47555088197295e-29	2.67795078397994e-30	AKT1/AKT2/AKT3/BUB1B-PAK6/CDC42/FYN/GRB2/GSK3B/HRAS/JUN/MAP2K1/MAPK1/MAPK10/MAPK3/MAPK8/MAPK9/PAK1/PAK2/PAK3/PAK4/PAK5/PAK6/PDPK1/PIK3CA/PIK3CB/PIK3CD/PIK3R1/PIK3R2/PIK3R3/RAF1/RHOA/SOS1/SOS2/VAV1/VAV2/VAV3	36	0.295081967213115
60	Environmental Information Processing	Signal transduction	hsa04024	cAMP signaling pathway	36/202	226/8536	2.27822633056859e-20	7.70799908509038e-20	1.3989109047351e-20	AKT1/AKT2/AKT3/BAD/BRAF/JUN/MAP2K1/MAPK1/MAPK10/MAPK3/MAPK8/MAPK9/MYL9/PAK1/PIK3CA/PIK3CB/PIK3CD/PIK3R1/PIK3R2/PIK3R3/PPP1CA/PPP1CB/PPP1CC/PPP1R12A/RAC1/RAC2/RAC3/RAF1/RAP1A/RAP1B/RHOA/ROCK1/ROCK2/VAV1/VAV2/VAV3	36	0.15929203539823
16	Human Diseases	Cancer: specific types	hsa05214	Glioma	35/202	76/8536	1.43685797230665e-37	1.82301355236406e-36	3.30855454149557e-37	AKT1/AKT2/AKT3/BRAF/CCND1/EGF/EGFR/GRB2/HRAS/IGF1/IGF1R/MAP2K1/MAPK1/MAPK3/PDGFA/PDGFB/PDGFRA/PDGFRB/PIK3CA/PIK3CB/PIK3CD/PIK3R1/PIK3R2/PIK3R3/PRKCA/PRKCB/PRKCG/PTEN/RAF1/SHC1/SHC2/SHC3/SHC4/SOS1/SOS2	35	0.460526315789474
23	Human Diseases	Drug resistance: antineoplastic	hsa01522	Endocrine resistance	35/202	99/8536	1.20054257462539e-32	1.05960931586501e-31	1.92306590901092e-32	AKT1/AKT2/AKT3/BAD/BCL2/BRAF/CCND1/EGFR/ERBB2/GRB2/HRAS/IGF1/IGF1R/JUN/MAP2K1/MAPK1/MAPK10/MAPK3/MAPK8/MAPK9/PIK3CA/PIK3CB/PIK3CD/PIK3R1/PIK3R2/PIK3R3/PTK2/RAF1/SHC1/SHC2/SHC3/SHC4/SOS1/SOS2/SRC	35	0.353535353535354
37	Organismal Systems	Endocrine system	hsa04910	Insulin signaling pathway	35/202	138/8536	5.34141544987826e-27	2.93056036844672e-26	5.31862135834251e-27	AKT1/AKT2/AKT3/BAD/BRAF/CRK/CRKL/ELK1/GRB2/GSK3B/HRAS/MAP2K1/MAPK1/MAPK10/MAPK3/MAPK8/MAPK9/PDPK1/PIK3CA/PIK3CB/PIK3CD/PIK3R1/PIK3R2/PIK3R3/PPP1CA/PPP1CB/PPP1CC/RAF1/RAPGEF1/SHC1/SHC2/SHC3/SHC4/SOS1/SOS2	35	0.253623188405797
41	Environmental Information Processing	Signal transduction	hsa04072	Phospholipase D signaling pathway	35/202	149/8536	9.24039180154658e-26	4.57512081881453e-25	8.30330457135123e-26	AKT1/AKT2/AKT3/EGF/EGFR/FYN/GRB2/HRAS/MAP2K1/MAPK1/MAPK3/PDGFA/PDGFB/PDGFC/PDGFD/PDGFRA/PDGFRB/PIK3CA/PIK3CB/PIK3CD/PIK3R1/PIK3R2/PIK3R3/PIP5K1A/PIP5K1B/PIP5K1C/PRKCA/RAF1/RHOA/SHC1/SHC2/SHC3/SHC4/SOS1/SOS2	35	0.23489932885906
64	Human Diseases	Infectious disease: bacterial	hsa05132	Salmonella infection	35/202	251/8536	6.76683697321644e-18	2.14635610244209e-17	3.8953831260292e-18	ACTB/ACTG1/AKT1/AKT2/AKT3/BCL2/BIRC2/BIRC3/CDC42/CTNNB1/FLNA/HRAS/JUN/MAP2K1/MAPK1/MAPK10/MAPK3/MAPK8/MAPK9/MYL10/MYL12A/MYL12B/MYL2/MYL5/MYL7/MYL9/PAK1/PAK3/PIK3CA/PIK3CB/PIK3CD/RAC1/RAF1/RHOA/ROCK2	35	0.139442231075697
30	Human Diseases	Infectious disease: parasitic	hsa05146	Amoebiasis	34/202	103/8536	1.50813636709052e-30	1.02050560839792e-29	1.85209729291819e-30	ACTN1/ACTN4/COL1A1/COL1A2/COL4A1/COL4A2/COL4A3/COL4A4/COL4A5/COL4A6/FN1/LAMA1/LAMA2/LAMA3/LAMA4/LAMA5/LAMB1/LAMB2/LAMB3/LAMB4/LAMC1/LAMC2/LAMC3/PIK3CA/PIK3CB/PIK3CD/PIK3R1/PIK3R2/PIK3R3/PRKCA/PRKCB/PRKCG/PTK2/VCL	34	0.330097087378641
28	Human Diseases	Cancer: specific types	hsa05210	Colorectal cancer	33/202	87/8536	5.42512185470754e-32	3.93321334466297e-31	7.13831822987834e-32	AKT1/AKT2/AKT3/BAD/BCL2/BRAF/CCND1/CTNNB1/EGF/EGFR/GRB2/GSK3B/HRAS/JUN/MAP2K1/MAPK1/MAPK10/MAPK3/MAPK8/MAPK9/PIK3CA/PIK3CB/PIK3CD/PIK3R1/PIK3R2/PIK3R3/RAC1/RAC2/RAC3/RAF1/RHOA/SOS1/SOS2	33	0.379310344827586
39	Organismal Systems	Endocrine system	hsa04935	Growth hormone synthesis, secretion and action	33/202	122/8536	1.78896867135502e-26	9.31181128936077e-26	1.68998390006548e-26	AKT1/AKT2/AKT3/BCAR1/CRK/CRKL/GRB2/GSK3B/HRAS/IGF1/MAP2K1/MAPK1/MAPK10/MAPK3/MAPK8/MAPK9/PIK3CA/PIK3CB/PIK3CD/PIK3R1/PIK3R2/PIK3R3/PRKCA/PRKCB/PRKCG/PTK2/RAF1/SHC1/SHC2/SHC3/SHC4/SOS1/SOS2	33	0.270491803278689
46	Human Diseases	Cardiovascular disease	hsa05418	Fluid shear stress and atherosclerosis	33/202	141/8536	2.94924580301037e-24	1.30151499567632e-23	2.36209618090076e-24	ACTB/ACTG1/AKT1/AKT2/AKT3/BCL2/CAV1/CAV2/CAV3/CTNNB1/ITGA2B/ITGAV/ITGB3/JUN/KDR/MAPK10/MAPK8/MAPK9/PDGFA/PDGFB/PIK3CA/PIK3CB/PIK3CD/PIK3R1/PIK3R2/PIK3R3/PTK2/RAC1/RAC2/RAC3/RHOA/SRC/VEGFA	33	0.234042553191489
48	Human Diseases	Cancer: specific types	hsa05224	Breast cancer	33/202	148/8536	1.56709475165659e-23	6.62750488721433e-23	1.20281395412238e-23	AKT1/AKT2/AKT3/BRAF/CCND1/CTNNB1/EGF/EGFR/ERBB2/FLT4/GRB2/GSK3B/HRAS/IGF1/IGF1R/JUN/MAP2K1/MAPK1/MAPK3/PIK3CA/PIK3CB/PIK3CD/PIK3R1/PIK3R2/PIK3R3/PTEN/RAF1/SHC1/SHC2/SHC3/SHC4/SOS1/SOS2	33	0.222972972972973
66	Human Diseases	Cancer: overview	hsa05208	Chemical carcinogenesis - reactive oxygen species	33/202	227/8536	1.82790405148245e-17	5.62218973410512e-17	1.02036111326772e-17	AKT1/AKT2/AKT3/BAD/BRAF/EGF/EGFR/GRB2/HGF/HRAS/JUN/MAP2K1/MAPK1/MAPK10/MAPK3/MAPK8/MAPK9/MET/PDPK1/PIK3CA/PIK3CB/PIK3CD/PIK3R1/PIK3R2/PIK3R3/PTEN/PTK2/RAC1/RAF1/SOS1/SOS2/SRC/VEGFA	33	0.145374449339207
25	Human Diseases	Infectious disease: bacterial	hsa05100	Bacterial invasion of epithelial cells	32/202	78/8536	2.35035634072579e-32	1.90848934866934e-31	3.46368302843801e-32	ACTB/ACTG1/BCAR1/CAV1/CAV2/CAV3/CDC42/CRK/CRKL/CTNNB1/DOCK1/FN1/ILK/ITGA5/ITGB1/MET/PIK3CA/PIK3CB/PIK3CD/PIK3R1/PIK3R2/PIK3R3/PTK2/PXN/RAC1/RHOA/SHC1/SHC2/SHC3/SHC4/SRC/VCL	32	0.41025641025641
67	Human Diseases	Cardiovascular disease	hsa05417	Lipid and atherosclerosis	32/202	216/8536	3.34551466486949e-17	1.01364101040076e-16	1.83963885735164e-17	AKT1/AKT2/AKT3/BAD/BCL2/CDC42/GSK3B/HRAS/JUN/MAPK1/MAPK10/MAPK3/MAPK8/MAPK9/PDPK1/PIK3CA/PIK3CB/PIK3CD/PIK3R1/PIK3R2/PIK3R3/PRKCA/PTK2/RAC1/RAP1A/RAP1B/RHOA/ROCK2/SRC/VAV1/VAV2/VAV3	32	0.148148148148148
58	Human Diseases	Cancer: specific types	hsa05226	Gastric cancer	31/202	150/8536	4.36380840584643e-21	1.52733294204625e-20	2.77192911442151e-21	AKT1/AKT2/AKT3/BCL2/BRAF/CCND1/CTNNB1/EGF/EGFR/ERBB2/GRB2/GSK3B/HGF/HRAS/MAP2K1/MAPK1/MAPK3/MET/PIK3CA/PIK3CB/PIK3CD/PIK3R1/PIK3R2/PIK3R3/RAF1/SHC1/SHC2/SHC3/SHC4/SOS1/SOS2	31	0.206666666666667
31	Human Diseases	Cancer: specific types	hsa05218	Melanoma	30/202	73/8536	2.16958947362831e-30	1.42073117144048e-29	2.57845947629851e-30	AKT1/AKT2/AKT3/BAD/BRAF/CCND1/EGF/EGFR/HGF/HRAS/IGF1/IGF1R/MAP2K1/MAPK1/MAPK3/MET/PDGFA/PDGFB/PDGFC/PDGFD/PDGFRA/PDGFRB/PIK3CA/PIK3CB/PIK3CD/PIK3R1/PIK3R2/PIK3R3/PTEN/RAF1	30	0.410958904109589
38	Cellular Processes	Cellular community - eukaryotes	hsa04520	Adherens junction	30/202	93/8536	1.15004814452776e-26	6.14367824576673e-26	1.11500512627345e-26	ACTB/ACTG1/ACTN1/ACTN4/CDC42/CTNNB1/EGFR/ERBB2/FYN/IGF1R/MAPK1/MAPK3/MET/MYL10/MYL12A/MYL12B/MYL2/MYL5/MYL7/MYL9/RAC1/RAC2/RAC3/RAP1A/RAP1B/RHOA/ROCK1/ROCK2/SRC/VCL	30	0.32258064516129
42	Organismal Systems	Immune system	hsa04666	Fc gamma R-mediated phagocytosis	30/202	99/8536	9.54089560947188e-26	4.61143287791141e-25	8.36920667497534e-26	AKT1/AKT2/AKT3/CDC42/CRK/CRKL/DOCK1/MAP2K1/MAPK1/MAPK3/PAK1/PIK3CA/PIK3CB/PIK3CD/PIK3R1/PIK3R2/PIK3R3/PIP5K1A/PIP5K1B/PIP5K1C/PRKCA/PRKCB/PRKCG/RAC1/RAC2/RAF1/VASP/VAV1/VAV2/VAV3	30	0.303030303030303
49	Environmental Information Processing	Signal transduction	hsa04071	Sphingolipid signaling pathway	30/202	122/8536	8.78589823075828e-23	3.63987212417129e-22	6.60593851936713e-23	AKT1/AKT2/AKT3/BCL2/FYN/HRAS/MAP2K1/MAPK1/MAPK10/MAPK3/MAPK8/MAPK9/PDPK1/PIK3CA/PIK3CB/PIK3CD/PIK3R1/PIK3R2/PIK3R3/PRKCA/PRKCB/PRKCG/PTEN/RAC1/RAC2/RAC3/RAF1/RHOA/ROCK1/ROCK2	30	0.245901639344262
56	Organismal Systems	Immune system	hsa04650	Natural killer cell mediated cytotoxicity	30/202	134/8536	1.68570137184723e-21	6.11066747294621e-21	1.10901406042581e-21	BRAF/FYN/GRB2/HRAS/MAP2K1/MAPK1/MAPK3/PAK1/PIK3CA/PIK3CB/PIK3CD/PIK3R1/PIK3R2/PIK3R3/PRKCA/PRKCB/PRKCG/RAC1/RAC2/RAC3/RAF1/SHC1/SHC2/SHC3/SHC4/SOS1/SOS2/VAV1/VAV2/VAV3	30	0.223880597014925
73	Human Diseases	Cancer: overview	hsa05207	Chemical carcinogenesis - receptor activation	30/202	215/8536	1.93577640879278e-15	5.38304946554704e-15	9.76959975598375e-16	AKT1/AKT2/AKT3/BAD/BCL2/CCND1/CCND3/EGF/EGFR/GRB2/HRAS/JUN/MAP2K1/MAPK1/MAPK3/PIK3CA/PIK3CB/PIK3CD/PIK3R1/PIK3R2/PIK3R3/PRKCA/PRKCB/PRKCG/RAF1/SOS1/SOS2/SRC/VEGFA/XIAP	30	0.13953488372093
26	Human Diseases	Cancer: specific types	hsa05213	Endometrial cancer	29/202	59/8536	2.91869162590735e-32	2.27882461561227e-31	4.135797850476e-32	AKT1/AKT2/AKT3/BAD/BRAF/CCND1/CTNNB1/EGF/EGFR/ELK1/ERBB2/GRB2/GSK3B/HRAS/ILK/MAP2K1/MAPK1/MAPK3/PDPK1/PIK3CA/PIK3CB/PIK3CD/PIK3R1/PIK3R2/PIK3R3/PTEN/RAF1/SOS1/SOS2	29	0.491525423728814
34	Organismal Systems	Immune system	hsa04664	Fc epsilon RI signaling pathway	29/202	69/8536	9.59373159785397e-30	5.72802210107164e-29	1.03956843939594e-29	AKT1/AKT2/AKT3/FYN/GRB2/HRAS/MAP2K1/MAPK1/MAPK10/MAPK3/MAPK8/MAPK9/PDPK1/PIK3CA/PIK3CB/PIK3CD/PIK3R1/PIK3R2/PIK3R3/PRKCA/RAC1/RAC2/RAC3/RAF1/SOS1/SOS2/VAV1/VAV2/VAV3	29	0.420289855072464
35	Human Diseases	Cancer: specific types	hsa05223	Non-small cell lung cancer	29/202	73/8536	7.1026969082363e-29	4.11956420677706e-28	7.47652306130137e-29	AKT1/AKT2/AKT3/BAD/BRAF/CCND1/EGF/EGFR/ERBB2/GRB2/HGF/HRAS/MAP2K1/MAPK1/MAPK3/MET/PDPK1/PIK3CA/PIK3CB/PIK3CD/PIK3R1/PIK3R2/PIK3R3/PRKCA/PRKCB/PRKCG/RAF1/SOS1/SOS2	29	0.397260273972603
59	Environmental Information Processing	Signal transduction	hsa04068	FoxO signaling pathway	29/202	133/8536	1.83849788130323e-20	6.32567915092467e-20	1.1480361435435e-20	AKT1/AKT2/AKT3/BRAF/CCND1/CCND2/EGF/EGFR/GRB2/HRAS/IGF1/IGF1R/MAP2K1/MAPK1/MAPK10/MAPK3/MAPK8/MAPK9/PDPK1/PIK3CA/PIK3CB/PIK3CD/PIK3R1/PIK3R2/PIK3R3/PTEN/RAF1/SOS1/SOS2	29	0.218045112781955
62	Organismal Systems	Endocrine system	hsa04921	Oxytocin signaling pathway	29/202	155/8536	1.65311771248646e-18	5.41262734894762e-18	9.82328012513179e-19	ACTB/ACTG1/CCND1/EGFR/ELK1/HRAS/JUN/MAP2K1/MAPK1/MAPK3/MYL9/MYLK/MYLK2/MYLK3/MYLK4/PPP1CA/PPP1CB/PPP1CC/PPP1R12A/PPP1R12B/PPP1R12C/PRKCA/PRKCB/PRKCG/RAF1/RHOA/ROCK1/ROCK2/SRC	29	0.187096774193548
65	Human Diseases	Infectious disease: viral	hsa05161	Hepatitis B	29/202	163/8536	7.01275948656854e-18	2.1901387319591e-17	3.97484343368258e-18	AKT1/AKT2/AKT3/BAD/BCL2/BRAF/ELK1/GRB2/HRAS/JUN/MAP2K1/MAPK1/MAPK10/MAPK3/MAPK8/MAPK9/PIK3CA/PIK3CB/PIK3CD/PIK3R1/PIK3R2/PIK3R3/PRKCA/PRKCB/PRKCG/RAF1/SOS1/SOS2/SRC	29	0.177914110429448
33	Environmental Information Processing	Signal transduction	hsa04370	VEGF signaling pathway	28/202	60/8536	2.3986787736506e-30	1.47555088197295e-29	2.67795078397994e-30	AKT1/AKT2/AKT3/BAD/CDC42/HRAS/KDR/MAP2K1/MAPK1/MAPK3/PIK3CA/PIK3CB/PIK3CD/PIK3R1/PIK3R2/PIK3R3/PRKCA/PRKCB/PRKCG/PTK2/PXN/RAC1/RAC2/RAC3/RAF1/SHC2/SRC/VEGFA	28	0.466666666666667
36	Organismal Systems	Endocrine system	hsa04917	Prolactin signaling pathway	28/202	71/8536	8.56825568544198e-28	4.83154417817979e-27	8.76868271901958e-28	AKT1/AKT2/AKT3/CCND1/CCND2/GRB2/GSK3B/HRAS/MAP2K1/MAPK1/MAPK10/MAPK3/MAPK8/MAPK9/PIK3CA/PIK3CB/PIK3CD/PIK3R1/PIK3R2/PIK3R3/RAF1/SHC1/SHC2/SHC3/SHC4/SOS1/SOS2/SRC	28	0.394366197183099
55	Human Diseases	Infectious disease: parasitic	hsa05145	Toxoplasmosis	28/202	112/8536	1.59339647143423e-21	5.88108152183906e-21	1.06734691866408e-21	AKT1/AKT2/AKT3/BAD/BCL2/BIRC2/BIRC3/ITGA6/ITGB1/LAMA1/LAMA2/LAMA3/LAMA4/LAMA5/LAMB1/LAMB2/LAMB3/LAMB4/LAMC1/LAMC2/LAMC3/MAPK1/MAPK10/MAPK3/MAPK8/MAPK9/PDPK1/XIAP	28	0.25
44	Human Diseases	Cancer: specific types	hsa05212	Pancreatic cancer	27/202	77/8536	3.42335132590603e-25	1.57940981627028e-24	2.86644249776821e-25	AKT1/AKT2/AKT3/BAD/BRAF/CCND1/CDC42/EGF/EGFR/ERBB2/MAP2K1/MAPK1/MAPK10/MAPK3/MAPK8/MAPK9/PIK3CA/PIK3CB/PIK3CD/PIK3R1/PIK3R2/PIK3R3/RAC1/RAC2/RAC3/RAF1/VEGFA	27	0.350649350649351
52	Human Diseases	Cardiovascular disease	hsa05410	Hypertrophic cardiomyopathy	27/202	99/8536	7.0180354190696e-22	2.73973305782909e-21	4.97229230096025e-22	ACTB/ACTG1/CAV3/IGF1/ITGA1/ITGA10/ITGA11/ITGA2/ITGA2B/ITGA3/ITGA4/ITGA5/ITGA6/ITGA7/ITGA8/ITGA9/ITGAV/ITGB1/ITGB3/ITGB4/ITGB5/ITGB6/ITGB7/ITGB8/LAMA1/LAMA2/MYL2	27	0.272727272727273
57	Human Diseases	Cardiovascular disease	hsa05414	Dilated cardiomyopathy	27/202	105/8536	3.89623859262713e-21	1.38760777947948e-20	2.51834442736749e-21	ACTB/ACTG1/CAV3/IGF1/ITGA1/ITGA10/ITGA11/ITGA2/ITGA2B/ITGA3/ITGA4/ITGA5/ITGA6/ITGA7/ITGA8/ITGA9/ITGAV/ITGB1/ITGB3/ITGB4/ITGB5/ITGB6/ITGB7/ITGB8/LAMA1/LAMA2/MYL2	27	0.257142857142857
61	Organismal Systems	Endocrine system	hsa04919	Thyroid hormone signaling pathway	27/202	122/8536	2.7676461692647e-19	9.21036348132349e-19	1.67157231965944e-19	ACTB/ACTG1/AKT1/AKT2/AKT3/BAD/CCND1/CTNNB1/GSK3B/HRAS/ITGAV/ITGB3/MAP2K1/MAPK1/MAPK3/PDPK1/PIK3CA/PIK3CB/PIK3CD/PIK3R1/PIK3R2/PIK3R3/PRKCA/PRKCB/PRKCG/RAF1/SRC	27	0.221311475409836
63	Cellular Processes	Cell growth and death	hsa04210	Apoptosis	27/202	135/8536	4.52183300413385e-18	1.4570350791098e-17	2.64434678604319e-18	ACTB/ACTG1/AKT1/AKT2/AKT3/BAD/BCL2/BIRC2/BIRC3/CAPN2/HRAS/JUN/MAP2K1/MAPK1/MAPK10/MAPK3/MAPK8/MAPK9/PDPK1/PIK3CA/PIK3CB/PIK3CD/PIK3R1/PIK3R2/PIK3R3/RAF1/XIAP	27	0.2
70	Environmental Information Processing	Signal transduction	hsa04150	mTOR signaling pathway	27/202	158/8536	3.05779054276353e-16	8.86759257401424e-16	1.60936344355975e-16	AKT1/AKT2/AKT3/BRAF/GRB2/GSK3B/HRAS/IGF1/IGF1R/MAP2K1/MAPK1/MAPK3/PDPK1/PIK3CA/PIK3CB/PIK3CD/PIK3R1/PIK3R2/PIK3R3/PRKCA/PRKCB/PRKCG/PTEN/RAF1/RHOA/SOS1/SOS2	27	0.170886075949367
47	Human Diseases	Cancer: specific types	hsa05220	Chronic myeloid leukemia	26/202	77/8536	8.55177985323748e-24	3.69364108554725e-23	6.70352284128358e-24	AKT1/AKT2/AKT3/BAD/BRAF/CCND1/CRK/CRKL/GRB2/HRAS/MAP2K1/MAPK1/MAPK3/PIK3CA/PIK3CB/PIK3CD/PIK3R1/PIK3R2/PIK3R3/RAF1/SHC1/SHC2/SHC3/SHC4/SOS1/SOS2	26	0.337662337662338
50	Human Diseases	Cardiovascular disease	hsa05412	Arrhythmogenic right ventricular cardiomyopathy	26/202	86/8536	2.21776008222825e-22	9.00410593384671e-22	1.63413900795766e-22	ACTB/ACTG1/CAV3/CTNNB1/ITGA1/ITGA10/ITGA11/ITGA2/ITGA2B/ITGA3/ITGA4/ITGA5/ITGA6/ITGA7/ITGA8/ITGA9/ITGAV/ITGB1/ITGB3/ITGB4/ITGB5/ITGB6/ITGB7/ITGB8/LAMA1/LAMA2	26	0.302325581395349
54	Organismal Systems	Immune system	hsa04662	B cell receptor signaling pathway	26/202	91/8536	1.12855249731787e-21	4.24252142510237e-21	7.69967590762681e-22	AKT1/AKT2/AKT3/GRB2/GSK3B/HRAS/JUN/MAP2K1/MAPK1/MAPK3/PIK3CA/PIK3CB/PIK3CD/PIK3R1/PIK3R2/PIK3R3/PRKCB/RAC1/RAC2/RAC3/RAF1/SOS1/SOS2/VAV1/VAV2/VAV3	26	0.285714285714286
72	Organismal Systems	Endocrine system	hsa04915	Estrogen signaling pathway	25/202	139/8536	1.19431305771153e-15	3.36729931549224e-15	6.11125102630171e-16	AKT1/AKT2/AKT3/BCL2/EGFR/GRB2/HRAS/JUN/MAP2K1/MAPK1/MAPK3/PIK3CA/PIK3CB/PIK3CD/PIK3R1/PIK3R2/PIK3R3/RAF1/SHC1/SHC2/SHC3/SHC4/SOS1/SOS2/SRC	25	0.179856115107914
85	Human Diseases	Infectious disease: viral	hsa05167	Kaposi sarcoma-associated herpesvirus infection	25/202	196/8536	4.035779803203e-12	9.63839176529657e-12	1.74925440386508e-12	AKT1/AKT2/AKT3/CCND1/CTNNB1/GSK3B/HRAS/JUN/MAP2K1/MAPK1/MAPK10/MAPK3/MAPK8/MAPK9/PDGFB/PIK3CA/PIK3CB/PIK3CD/PIK3R1/PIK3R2/PIK3R3/RAC1/RAF1/SRC/VEGFA	25	0.127551020408163
95	Human Diseases	Infectious disease: viral	hsa05166	Human T-cell leukemia virus 1 infection	25/202	224/8536	7.88341774498245e-11	1.68456189708572e-10	3.05728111993779e-11	AKT1/AKT2/AKT3/CCND1/CCND2/CCND3/ELK1/HRAS/JUN/MAP2K1/MAPK1/MAPK10/MAPK3/MAPK8/MAPK9/PIK3CA/PIK3CB/PIK3CD/PIK3R1/PIK3R2/PIK3R3/PTEN/TLN1/TLN2/XIAP	25	0.111607142857143
104	Environmental Information Processing	Signal transduction	hsa04020	Calcium signaling pathway	25/202	254/8536	1.16837339822348e-09	2.28057499845545e-09	4.13897458884837e-10	EGF/EGFR/ERBB2/FLT1/FLT4/HGF/KDR/MET/MYLK/MYLK2/MYLK3/MYLK4/PDGFA/PDGFB/PDGFC/PDGFD/PDGFRA/PDGFRB/PRKCA/PRKCB/PRKCG/VEGFA/VEGFB/VEGFC/VEGFD	25	0.0984251968503937
77	Human Diseases	Infectious disease: viral	hsa05160	Hepatitis C	24/202	159/8536	2.66746383072064e-13	7.03240464462714e-13	1.27629848359839e-13	AKT1/AKT2/AKT3/BAD/BRAF/CCND1/CTNNB1/EGF/EGFR/GRB2/GSK3B/HRAS/MAP2K1/MAPK1/MAPK3/PIK3CA/PIK3CB/PIK3CD/PIK3R1/PIK3R2/PIK3R3/RAF1/SOS1/SOS2	24	0.150943396226415
81	Environmental Information Processing	Signal transduction	hsa04630	JAK-STAT signaling pathway	24/202	168/8536	9.21732861576258e-13	2.31002186296272e-12	4.19241717416102e-13	AKT1/AKT2/AKT3/BCL2/CCND1/CCND2/CCND3/EGF/EGFR/GRB2/HRAS/PDGFA/PDGFB/PDGFRA/PDGFRB/PIK3CA/PIK3CB/PIK3CD/PIK3R1/PIK3R2/PIK3R3/RAF1/SOS1/SOS2	24	0.142857142857143
91	Organismal Systems	Immune system	hsa04613	Neutrophil extracellular trap formation	24/202	193/8536	1.94584434506239e-11	4.34072969283149e-11	7.87791232818783e-12	ACTB/ACTG1/AKT1/AKT2/AKT3/ITGA2B/ITGB3/MAP2K1/MAPK1/MAPK3/PIK3CA/PIK3CB/PIK3CD/PIK3R1/PIK3R2/PIK3R3/PRKCA/PRKCB/PRKCG/RAC1/RAC2/RAF1/SRC/VWF	24	0.124352331606218
94	Human Diseases	Cardiovascular disease	hsa05415	Diabetic cardiomyopathy	24/202	205/8536	7.08329589458711e-11	1.52969049638424e-10	2.77620779743056e-11	AKT1/AKT2/AKT3/COL1A1/COL1A2/GSK3B/MAPK10/MAPK8/MAPK9/PIK3CA/PIK3CB/PIK3CD/PIK3R1/PIK3R2/PIK3R3/PPP1CA/PPP1CB/PPP1CC/PRKCA/PRKCB/PRKCG/PTEN/RAC1/RAC2	24	0.117073170731707
71	Environmental Information Processing	Signal transduction	hsa04066	HIF-1 signaling pathway	23/202	110/8536	5.55544445810946e-16	1.58838764083975e-15	2.88273619027177e-16	AKT1/AKT2/AKT3/BCL2/EGF/EGFR/ERBB2/FLT1/IGF1/IGF1R/MAP2K1/MAPK1/MAPK3/PIK3CA/PIK3CB/PIK3CD/PIK3R1/PIK3R2/PIK3R3/PRKCA/PRKCB/PRKCG/VEGFA	23	0.209090909090909
88	Cellular Processes	Cellular community - eukaryotes	hsa04530	Tight junction	23/202	170/8536	9.03714750948127e-12	2.08470561866443e-11	3.78349477071584e-12	ACTB/ACTG1/ACTN1/ACTN4/CCND1/CDC42/ERBB2/ITGB1/JUN/MAPK10/MAPK8/MAPK9/MYL12A/MYL12B/MYL2/MYL9/RAC1/RAP1A/RHOA/ROCK1/ROCK2/SRC/VASP	23	0.135294117647059
80	Organismal Systems	Circulatory system	hsa04270	Vascular smooth muscle contraction	22/202	134/8536	4.81093207874777e-13	1.22077401498225e-12	2.2155608257391e-13	BRAF/MAP2K1/MAPK1/MAPK3/MYL9/MYLK/MYLK2/MYLK3/MYLK4/PPP1CA/PPP1CB/PPP1CC/PPP1R12A/PPP1R12B/PPP1R12C/PRKCA/PRKCB/PRKCG/RAF1/RHOA/ROCK1/ROCK2	22	0.164179104477612
90	Cellular Processes	Cell growth and death	hsa04218	Cellular senescence	22/202	157/8536	1.29368650418712e-11	2.91798178166651e-11	5.29579270719875e-12	AKT1/AKT2/AKT3/CAPN2/CCND1/CCND2/CCND3/HRAS/MAP2K1/MAPK1/MAPK3/PIK3CA/PIK3CB/PIK3CD/PIK3R1/PIK3R2/PIK3R3/PPP1CA/PPP1CB/PPP1CC/PTEN/RAF1	22	0.140127388535032
92	Cellular Processes	Transport and catabolism	hsa04140	Autophagy - animal	22/202	169/8536	5.72601567917384e-11	1.26345780746988e-10	2.29302687381104e-11	AKT1/AKT2/AKT3/BAD/BCL2/HRAS/IGF1R/MAP2K1/MAPK1/MAPK10/MAPK3/MAPK8/MAPK9/PDPK1/PIK3CA/PIK3CB/PIK3CD/PIK3R1/PIK3R2/PIK3R3/PTEN/RAF1	22	0.130177514792899
105	Human Diseases	Cancer: overview	hsa05203	Viral carcinogenesis	22/202	205/8536	2.47195538150164e-09	4.77911373756984e-09	8.67352765439172e-10	ACTN1/ACTN4/BAD/CCND1/CCND2/CCND3/CDC42/GRB2/HRAS/JUN/MAPK1/MAPK3/PIK3CA/PIK3CB/PIK3CD/PIK3R1/PIK3R2/PIK3R3/PXN/RAC1/RHOA/SRC	22	0.107317073170732
137	Human Diseases	Neurodegenerative disease	hsa05010	Alzheimer disease	22/202	391/8536	0.000134974183468931	0.000199998242658343	3.62973217165776e-05	AKT1/AKT2/AKT3/BAD/BRAF/CAPN2/CTNNB1/GSK3B/HRAS/MAP2K1/MAPK1/MAPK10/MAPK3/MAPK8/MAPK9/PIK3CA/PIK3CB/PIK3CD/PIK3R1/PIK3R2/PIK3R3/RAF1	22	0.0562659846547315
79	Environmental Information Processing	Signal transduction	hsa04668	TNF signaling pathway	21/202	119/8536	3.86653851960354e-13	9.93553568961416e-13	1.80318252080112e-13	AKT1/AKT2/AKT3/BIRC2/BIRC3/JUN/MAP2K1/MAPK1/MAPK10/MAPK3/MAPK8/MAPK9/PIK3CA/PIK3CB/PIK3CD/PIK3R1/PIK3R2/PIK3R3/VEGFC/VEGFD/XIAP	21	0.176470588235294
99	Environmental Information Processing	Signal transduction	hsa04022	cGMP-PKG signaling pathway	21/202	166/8536	2.77017051751544e-10	5.68024863692559e-10	1.03089811922425e-10	AKT1/AKT2/AKT3/BAD/MAP2K1/MAPK1/MAPK3/MYL9/MYLK/MYLK2/MYLK3/MYLK4/PPP1CA/PPP1CB/PPP1CC/PPP1R12A/RAF1/RHOA/ROCK1/ROCK2/VASP	21	0.126506024096386
68	Human Diseases	Cancer: specific types	hsa05221	Acute myeloid leukemia	20/202	68/8536	3.58429343688199e-17	1.07001701130448e-16	1.94195464846548e-17	AKT1/AKT2/AKT3/BAD/BRAF/CCND1/GRB2/HRAS/MAP2K1/MAPK1/MAPK3/PIK3CA/PIK3CB/PIK3CD/PIK3R1/PIK3R2/PIK3R3/RAF1/SOS1/SOS2	20	0.294117647058824
69	Human Diseases	Cancer: overview	hsa05230	Central carbon metabolism in cancer	20/202	71/8536	9.24692848263653e-17	2.72047316228292e-16	4.93733786258243e-17	AKT1/AKT2/AKT3/EGFR/ERBB2/HRAS/MAP2K1/MAPK1/MAPK3/MET/PDGFRA/PDGFRB/PIK3CA/PIK3CB/PIK3CD/PIK3R1/PIK3R2/PIK3R3/PTEN/RAF1	20	0.28169014084507
75	Cellular Processes	Cellular community - eukaryotes	hsa04540	Gap junction	20/202	92/8536	2.22068129873588e-14	6.01064404857846e-14	1.09086098885271e-14	EGF/EGFR/GRB2/HRAS/MAP2K1/MAPK1/MAPK3/PDGFA/PDGFB/PDGFC/PDGFD/PDGFRA/PDGFRB/PRKCA/PRKCB/PRKCG/RAF1/SOS1/SOS2/SRC	20	0.217391304347826
78	Organismal Systems	Immune system	hsa04625	C-type lectin receptor signaling pathway	20/202	105/8536	3.20804345405699e-13	8.34913873299447e-13	1.51527018747631e-13	AKT1/AKT2/AKT3/HRAS/JUN/MAPK1/MAPK10/MAPK3/MAPK8/MAPK9/PAK1/PIK3CA/PIK3CB/PIK3CD/PIK3R1/PIK3R2/PIK3R3/RAF1/RHOA/SRC	20	0.19047619047619
97	Organismal Systems	Development and regeneration	hsa04380	Osteoclast differentiation	20/202	143/8536	1.20803685144322e-10	2.52815959631931e-10	4.58831142707679e-11	AKT1/AKT2/AKT3/FYN/GRB2/ITGB3/JUN/MAP2K1/MAPK1/MAPK10/MAPK3/MAPK8/MAPK9/PIK3CA/PIK3CB/PIK3CD/PIK3R1/PIK3R2/PIK3R3/RAC1	20	0.13986013986014
125	Human Diseases	Neurodegenerative disease	hsa05020	Prion disease	20/202	278/8536	8.69647485730625e-06	1.41230751682653e-05	2.56317153689026e-06	BAD/CAV1/CAV2/CAV3/FYN/GSK3B/LAMC1/MAPK1/MAPK10/MAPK3/MAPK8/MAPK9/PIK3CA/PIK3CB/PIK3CD/PIK3R1/PIK3R2/PIK3R3/RAC1/RAC2	20	0.0719424460431655
87	Human Diseases	Endocrine and metabolic disease	hsa04931	Insulin resistance	19/202	109/8536	6.78420333170935e-12	1.58298077739885e-11	2.8729233709598e-12	AKT1/AKT2/AKT3/GSK3B/MAPK10/MAPK8/MAPK9/PDPK1/PIK3CA/PIK3CB/PIK3CD/PIK3R1/PIK3R2/PIK3R3/PPP1CA/PPP1CB/PPP1CC/PRKCB/PTEN	19	0.174311926605505
89	Organismal Systems	Endocrine system	hsa04914	Progesterone-mediated oocyte maturation	19/202	111/8536	9.49255254691279e-12	2.1651552438464e-11	3.92950134999347e-12	AKT1/AKT2/AKT3/BRAF/IGF1/IGF1R/MAP2K1/MAPK1/MAPK10/MAPK3/MAPK8/MAPK9/PIK3CA/PIK3CB/PIK3CD/PIK3R1/PIK3R2/PIK3R3/RAF1	19	0.171171171171171
102	Human Diseases	Infectious disease: viral	hsa05162	Measles	19/202	139/8536	5.38621450141935e-10	1.0719622978315e-09	1.94548511403176e-10	AKT1/AKT2/AKT3/BAD/BCL2/CCND1/CCND2/CCND3/GSK3B/JUN/MAPK10/MAPK8/MAPK9/PIK3CA/PIK3CB/PIK3CD/PIK3R1/PIK3R2/PIK3R3	19	0.136690647482014
103	Cellular Processes	Cellular community - eukaryotes	hsa04550	Signaling pathways regulating pluripotency of stem cells	19/202	144/8536	9.95780902712641e-10	1.96255847816181e-09	3.56181212007587e-10	AKT1/AKT2/AKT3/CTNNB1/GRB2/GSK3B/HRAS/IGF1/IGF1R/MAP2K1/MAPK1/MAPK3/PIK3CA/PIK3CB/PIK3CD/PIK3R1/PIK3R2/PIK3R3/RAF1	19	0.131944444444444
109	Human Diseases	Infectious disease: viral	hsa05168	Herpes simplex virus 1 infection	19/202	182/8536	5.06412772386696e-08	9.43135713711002e-08	1.71168006118149e-08	AKT1/AKT2/AKT3/BAD/BCL2/BIRC2/BIRC3/ITGA5/ITGB3/PIK3CA/PIK3CB/PIK3CD/PIK3R1/PIK3R2/PIK3R3/PPP1CA/PPP1CB/PPP1CC/SRC	19	0.104395604395604
113	Human Diseases	Infectious disease: bacterial	hsa05130	Pathogenic Escherichia coli infection	19/202	203/8536	2.89083027150884e-07	5.19326146120616e-07	9.42515691688957e-08	ACTB/ACTG1/CDC42/FYN/ITGB1/JUN/MAPK1/MAPK10/MAPK3/MAPK8/MAPK9/PAK1/PAK2/PAK3/RAC1/RHOA/ROCK1/ROCK2/SRC	19	0.0935960591133005
74	Organismal Systems	Endocrine system	hsa04929	GnRH secretion	18/202	65/8536	4.75798749597251e-15	1.30523170497624e-14	2.36884156982984e-15	AKT1/AKT2/AKT3/HRAS/MAP2K1/MAPK1/MAPK3/PIK3CA/PIK3CB/PIK3CD/PIK3R1/PIK3R2/PIK3R3/PRKCA/PRKCB/PRKCG/RAF1/SPP1	18	0.276923076923077
76	Human Diseases	Drug resistance: antineoplastic	hsa01524	Platinum drug resistance	18/202	75/8536	7.42329594747622e-14	1.98280141754957e-13	3.59855066705911e-14	AKT1/AKT2/AKT3/BAD/BCL2/BIRC2/BIRC3/ERBB2/MAPK1/MAPK3/PDPK1/PIK3CA/PIK3CB/PIK3CD/PIK3R1/PIK3R2/PIK3R3/XIAP	18	0.24
83	Human Diseases	Cancer: overview	hsa05235	PD-L1 expression and PD-1 checkpoint pathway in cancer	18/202	90/8536	2.15547508874288e-12	5.27182461463619e-12	9.56773977247947e-13	AKT1/AKT2/AKT3/EGF/EGFR/HRAS/JUN/MAP2K1/MAPK1/MAPK3/PIK3CA/PIK3CB/PIK3CD/PIK3R1/PIK3R2/PIK3R3/PTEN/RAF1	18	0.2
84	Organismal Systems	Endocrine system	hsa04912	GnRH signaling pathway	18/202	93/8536	3.89227386201395e-12	9.40632849986704e-12	1.70713765877805e-12	CDC42/EGFR/ELK1/GRB2/HRAS/JUN/MAP2K1/MAPK1/MAPK10/MAPK3/MAPK8/MAPK9/PRKCA/PRKCB/RAF1/SOS1/SOS2/SRC	18	0.193548387096774
93	Organismal Systems	Immune system	hsa04620	Toll-like receptor signaling pathway	18/202	109/8536	6.39535545134276e-11	1.39597543722858e-10	2.53353073907183e-11	AKT1/AKT2/AKT3/JUN/MAP2K1/MAPK1/MAPK10/MAPK3/MAPK8/MAPK9/PIK3CA/PIK3CB/PIK3CD/PIK3R1/PIK3R2/PIK3R3/RAC1/SPP1	18	0.165137614678899
98	Organismal Systems	Nervous system	hsa04725	Cholinergic synapse	18/202	116/8536	1.86383196421136e-10	3.86079478300925e-10	7.00688708350137e-11	AKT1/AKT2/AKT3/BCL2/FYN/HRAS/MAP2K1/MAPK1/MAPK3/PIK3CA/PIK3CB/PIK3CD/PIK3R1/PIK3R2/PIK3R3/PRKCA/PRKCB/PRKCG	18	0.155172413793103
110	Human Diseases	Infectious disease: viral	hsa05164	Influenza A	18/202	173/8536	1.22048994926661e-07	2.25235872455565e-07	4.08776538031878e-08	ACTB/ACTG1/AKT1/AKT2/AKT3/CCND3/MAP2K1/MAPK1/MAPK3/PIK3CA/PIK3CB/PIK3CD/PIK3R1/PIK3R2/PIK3R3/PRKCA/PRKCB/RAF1	18	0.104046242774566
121	Human Diseases	Infectious disease: viral	hsa05169	Epstein-Barr virus infection	18/202	204/8536	1.43550976496106e-06	2.40833456435616e-06	4.37084312950301e-07	AKT1/AKT2/AKT3/BCL2/CCND1/CCND2/CCND3/JUN/MAPK10/MAPK8/MAPK9/PIK3CA/PIK3CB/PIK3CD/PIK3R1/PIK3R2/PIK3R3/RAC1	18	0.0882352941176471
164	Human Diseases	Neurodegenerative disease	hsa05022	Pathways of neurodegeneration - multiple diseases	18/202	483/8536	0.0370854568329773	0.0459045593725268	0.00833113600227346	BAD/BCL2/BRAF/CAPN2/CTNNB1/GSK3B/HRAS/MAP2K1/MAPK1/MAPK10/MAPK3/MAPK8/MAPK9/PRKCA/PRKCB/PRKCG/RAC1/RAF1	18	0.0372670807453416
96	Organismal Systems	Sensory system	hsa04750	Inflammatory mediator regulation of TRP channels	17/202	99/8536	1.17090205672567e-10	2.47596997411781e-10	4.49359341945157e-11	IGF1/MAPK10/MAPK8/MAPK9/PIK3CA/PIK3CB/PIK3CD/PIK3R1/PIK3R2/PIK3R3/PPP1CA/PPP1CB/PPP1CC/PRKCA/PRKCB/PRKCG/SRC	17	0.171717171717172
100	Organismal Systems	Digestive system	hsa04974	Protein digestion and absorption	17/202	105/8536	3.0693298578213e-10	6.23073961137723e-10	1.13080573709206e-10	COL1A1/COL1A2/COL2A1/COL4A1/COL4A2/COL4A3/COL4A4/COL4A5/COL4A6/COL6A1/COL6A2/COL6A3/COL6A5/COL6A6/COL9A1/COL9A2/COL9A3	17	0.161904761904762
117	Environmental Information Processing	Signal transduction	hsa04310	Wnt signaling pathway	17/202	174/8536	6.85885557796096e-07	1.19004075412485e-06	2.15978358280372e-07	CCND1/CCND2/CCND3/CTNNB1/GSK3B/JUN/MAPK10/MAPK8/MAPK9/PRKCA/PRKCB/PRKCG/RAC1/RAC2/RAC3/RHOA/ROCK2	17	0.0977011494252874
131	Human Diseases	Infectious disease: viral	hsa05171	Coronavirus disease - COVID-19	17/202	238/8536	4.6362184724226e-05	7.18436908321975e-05	1.30387823651901e-05	EGFR/JUN/MAPK1/MAPK10/MAPK3/MAPK8/MAPK9/PIK3CA/PIK3CB/PIK3CD/PIK3R1/PIK3R2/PIK3R3/PRKCA/PRKCB/PRKCG/VWF	17	0.0714285714285714
112	Human Diseases	Neurodegenerative disease	hsa05017	Spinocerebellar ataxia	16/202	144/8536	2.55884899224668e-07	4.6379137984471e-07	8.41726642186407e-08	AKT1/AKT2/AKT3/MAPK10/MAPK8/MAPK9/PIK3CA/PIK3CB/PIK3CD/PIK3R1/PIK3R2/PIK3R3/PRKCA/PRKCB/PRKCG/RELN	16	0.111111111111111
118	Human Diseases	Endocrine and metabolic disease	hsa04932	Non-alcoholic fatty liver disease	16/202	157/8536	8.37998056781753e-07	1.44164072480251e-06	2.61640784900637e-07	AKT1/AKT2/AKT3/CDC42/GSK3B/JUN/MAPK10/MAPK8/MAPK9/PIK3CA/PIK3CB/PIK3CD/PIK3R1/PIK3R2/PIK3R3/RAC1	16	0.101910828025478
127	Human Diseases	Substance dependence	hsa05034	Alcoholism	16/202	188/8536	8.97842408031656e-06	1.43513392779863e-05	2.60459878003381e-06	BRAF/GRB2/HRAS/MAP2K1/MAPK1/MAPK3/PPP1CA/PPP1CB/PPP1CC/RAF1/SHC1/SHC2/SHC3/SHC4/SOS1/SOS2	16	0.0851063829787234
107	Human Diseases	Infectious disease: parasitic	hsa05142	Chagas disease	15/202	103/8536	1.58910842845115e-08	3.01485056986528e-08	5.471598130427e-09	AKT1/AKT2/AKT3/JUN/MAPK1/MAPK10/MAPK3/MAPK8/MAPK9/PIK3CA/PIK3CB/PIK3CD/PIK3R1/PIK3R2/PIK3R3	15	0.145631067961165
119	Environmental Information Processing	Signal transduction	hsa04371	Apelin signaling pathway	15/202	140/8536	9.84974455900982e-07	1.68025054241932e-06	3.04945651981728e-07	AKT1/AKT2/AKT3/CCND1/HRAS/MAP2K1/MAPK1/MAPK3/MYL2/MYLK/MYLK2/MYLK3/MYLK4/RAF1/SPP1	15	0.107142857142857
101	Organismal Systems	Nervous system	hsa04720	Long-term potentiation	14/202	67/8536	3.5762449092978e-10	7.1878981840342e-10	1.30451872668497e-10	BRAF/HRAS/MAP2K1/MAPK1/MAPK3/PPP1CA/PPP1CB/PPP1CC/PRKCA/PRKCB/PRKCG/RAF1/RAP1A/RAP1B	14	0.208955223880597
130	Cellular Processes	Transport and catabolism	hsa04145	Phagosome	14/202	159/8536	2.26318370569572e-05	3.534048401971e-05	6.4138809473158e-06	ACTB/ACTG1/COMP/ITGA2/ITGA5/ITGAV/ITGB1/ITGB3/ITGB5/RAC1/THBS1/THBS2/THBS3/THBS4	14	0.0880503144654088
82	Organismal Systems	Excretory system	hsa04960	Aldosterone-regulated sodium reabsorption	13/202	38/8536	1.59829990419135e-12	3.9567668359859e-12	7.18106503808694e-13	IGF1/MAPK1/MAPK3/PDPK1/PIK3CA/PIK3CB/PIK3CD/PIK3R1/PIK3R2/PIK3R3/PRKCA/PRKCB/PRKCG	13	0.342105263157895
86	Human Diseases	Cancer: specific types	hsa05219	Bladder cancer	13/202	41/8536	4.88613105937482e-12	1.1533541919222e-11	2.09320180022177e-12	BRAF/CCND1/EGF/EGFR/ERBB2/HRAS/MAP2K1/MAPK1/MAPK3/RAF1/SRC/THBS1/VEGFA	13	0.317073170731707
115	Environmental Information Processing	Signal transduction	hsa04070	Phosphatidylinositol signaling system	13/202	98/8536	4.5543912470944e-07	8.03949063617533e-07	1.45907271073962e-07	PIK3CA/PIK3CB/PIK3CD/PIK3R1/PIK3R2/PIK3R3/PIP5K1A/PIP5K1B/PIP5K1C/PRKCA/PRKCB/PRKCG/PTEN	13	0.13265306122449
122	Environmental Information Processing	Signal transduction	hsa04152	AMPK signaling pathway	13/202	122/8536	5.65367261027262e-06	9.40734049086345e-06	1.70732132320571e-06	AKT1/AKT2/AKT3/CCND1/IGF1/IGF1R/PDPK1/PIK3CA/PIK3CB/PIK3CD/PIK3R1/PIK3R2/PIK3R3	13	0.10655737704918
128	Organismal Systems	Nervous system	hsa04728	Dopaminergic synapse	13/202	132/8536	1.34732129358351e-05	2.13676736404259e-05	3.877980696992e-06	AKT1/AKT2/AKT3/GSK3B/MAPK10/MAPK8/MAPK9/PPP1CA/PPP1CB/PPP1CC/PRKCA/PRKCB/PRKCG	13	0.0984848484848485
134	Cellular Processes	Transport and catabolism	hsa04148	Efferocytosis	13/202	157/8536	8.4502078722526e-05	0.000128014343139349	2.32330931287385e-05	BCAR1/CRK/CRKL/DOCK1/ITGAV/ITGB3/ITGB5/MAP2K1/MAPK1/MAPK3/PTK2/RAC1/THBS1	13	0.0828025477707006
140	Human Diseases	Infectious disease: bacterial	hsa05152	Tuberculosis	13/202	182/8536	0.00036928840703781	0.000535468190204824	9.71811597467921e-05	AKT1/AKT2/AKT3/BAD/BCL2/MAPK1/MAPK10/MAPK3/MAPK8/MAPK9/RAF1/RHOA/SRC	13	0.0714285714285714
152	Cellular Processes	Transport and catabolism	hsa04144	Endocytosis	13/202	252/8536	0.00677777289100725	0.00905189405838468	0.00164281198881755	CAV1/CAV2/CAV3/CDC42/EGFR/HRAS/IGF1R/PDGFRA/PIP5K1A/PIP5K1B/PIP5K1C/RHOA/SRC	13	0.0515873015873016
108	Organismal Systems	Aging	hsa04213	Longevity regulating pathway - multiple species	12/202	62/8536	1.7027074081679e-08	3.20045929498226e-08	5.80845607074821e-09	AKT1/AKT2/AKT3/HRAS/IGF1/IGF1R/PIK3CA/PIK3CB/PIK3CD/PIK3R1/PIK3R2/PIK3R3	12	0.193548387096774
120	Organismal Systems	Aging	hsa04211	Longevity regulating pathway	12/202	90/8536	1.20755140400468e-06	2.04277445844124e-06	3.70739466141786e-07	AKT1/AKT2/AKT3/HRAS/IGF1/IGF1R/PIK3CA/PIK3CB/PIK3CD/PIK3R1/PIK3R2/PIK3R3	12	0.133333333333333
139	Environmental Information Processing	Signal transduction	hsa04390	Hippo signaling pathway	12/202	157/8536	0.000335288961846242	0.000489666613343792	8.88687138554977e-05	ACTB/ACTG1/BIRC2/BIRC3/CCND1/CCND2/CCND3/CTNNB1/GSK3B/PPP1CA/PPP1CB/PPP1CC	12	0.0764331210191083
106	Human Diseases	Endocrine and metabolic disease	hsa04930	Type II diabetes mellitus	11/202	47/8536	8.20922186781915e-09	1.57214343317669e-08	2.85325486964916e-09	MAPK1/MAPK10/MAPK3/MAPK8/MAPK9/PIK3CA/PIK3CB/PIK3CD/PIK3R1/PIK3R2/PIK3R3	11	0.234042553191489
111	Organismal Systems	Nervous system	hsa04730	Long-term depression	11/202	60/8536	1.2340205944281e-07	2.25681243845859e-07	4.09584834565988e-08	BRAF/HRAS/IGF1/IGF1R/MAP2K1/MAPK1/MAPK3/PRKCA/PRKCB/PRKCG/RAF1	11	0.183333333333333
116	Human Diseases	Cardiovascular disease	hsa05416	Viral myocarditis	11/202	70/8536	6.33523944962034e-07	1.10866690368356e-06	2.01209964370882e-07	ACTB/ACTG1/CAV1/CAV3/CCND1/FYN/LAMA1/LAMA2/RAC1/RAC2/RAC3	11	0.157142857142857
133	Organismal Systems	Endocrine system	hsa04928	Parathyroid hormone synthesis, secretion and action	11/202	115/8536	8.22548940839131e-05	0.000125546943601762	2.27852892199205e-05	BCL2/BRAF/EGFR/MAP2K1/MAPK1/MAPK3/PRKCA/PRKCB/PRKCG/RAF1/RHOA	11	0.0956521739130435
142	Organismal Systems	Circulatory system	hsa04261	Adrenergic signaling in cardiomyocytes	11/202	154/8536	0.00104105189549924	0.00148826432948131	0.000270102419143613	AKT1/AKT2/AKT3/BCL2/MAPK1/MAPK3/MYL2/PPP1CA/PPP1CB/PPP1CC/PRKCA	11	0.0714285714285714
150	Organismal Systems	Immune system	hsa04621	NOD-like receptor signaling pathway	11/202	189/8536	0.00518417880233157	0.00701592197915539	0.00127330707425688	BCL2/BIRC2/BIRC3/JUN/MAPK1/MAPK10/MAPK3/MAPK8/MAPK9/RHOA/XIAP	11	0.0582010582010582
114	Organismal Systems	Digestive system	hsa04973	Carbohydrate digestion and absorption	10/202	52/8536	2.93397446238562e-07	5.22453347249368e-07	9.4819119283007e-08	AKT1/AKT2/AKT3/PIK3CA/PIK3CB/PIK3CD/PIK3R1/PIK3R2/PIK3R3/PRKCB	10	0.192307692307692
123	Human Diseases	Infectious disease: bacterial	hsa05120	Epithelial cell signaling in Helicobacter pylori infection	10/202	71/8536	5.79016944942918e-06	9.55613331897661e-06	1.73432546623895e-06	CDC42/EGFR/JUN/MAPK10/MAPK8/MAPK9/MET/PAK1/RAC1/SRC	10	0.140845070422535
136	Organismal Systems	Endocrine system	hsa04916	Melanogenesis	10/202	101/8536	0.00013009541088416	0.00019418653242268	3.5242564868e-05	CTNNB1/GSK3B/HRAS/MAP2K1/MAPK1/MAPK3/PRKCA/PRKCB/PRKCG/RAF1	10	0.099009900990099
149	Human Diseases	Endocrine and metabolic disease	hsa04934	Cushing syndrome	10/202	155/8536	0.00368639027053771	0.00502239748267889	0.00091150589522303	BRAF/CCND1/CTNNB1/EGFR/GSK3B/MAP2K1/MAPK1/MAPK3/RAP1A/RAP1B	10	0.0645161290322581
159	Human Diseases	Cancer: overview	hsa05202	Transcriptional misregulation in cancer	10/202	198/8536	0.019071007141074	0.0243485185511825	0.00441896888406217	BIRC2/BIRC3/CCND2/FLT1/IGF1/IGF1R/ITGB7/MET/PDGFA/PTK2	10	0.0505050505050505
126	Organismal Systems	Endocrine system	hsa04923	Regulation of lipolysis in adipocytes	9/202	59/8536	8.78534863373861e-06	1.41541727988011e-05	2.56881538998205e-06	AKT1/AKT2/AKT3/PIK3CA/PIK3CB/PIK3CD/PIK3R1/PIK3R2/PIK3R3	9	0.152542372881356
132	Organismal Systems	Digestive system	hsa04971	Gastric acid secretion	9/202	76/8536	7.03828962508224e-05	0.000108240363173613	1.96443490333236e-05	ACTB/ACTG1/MYLK/MYLK2/MYLK3/MYLK4/PRKCA/PRKCB/PRKCG	9	0.118421052631579
135	Human Diseases	Infectious disease: bacterial	hsa05133	Pertussis	9/202	78/8536	8.64923387106757e-05	0.000130058850061238	2.36041470165587e-05	ITGA5/ITGB1/JUN/MAPK1/MAPK10/MAPK3/MAPK8/MAPK9/RHOA	9	0.115384615384615
144	Organismal Systems	Nervous system	hsa04726	Serotonergic synapse	9/202	115/8536	0.00157215318221405	0.00221629927770453	0.000402232173812074	BRAF/HRAS/MAP2K1/MAPK1/MAPK3/PRKCA/PRKCB/PRKCG/RAF1	9	0.0782608695652174
153	Human Diseases	Endocrine and metabolic disease	hsa04936	Alcoholic liver disease	9/202	144/8536	0.00707689408751374	0.00938960457362935	0.0017041024634536	AKT1/AKT2/AKT3/CCND1/CTNNB1/GSK3B/MAPK10/MAPK8/MAPK9	9	0.0625
167	Cellular Processes	Cell motility	hsa04814	Motor proteins	9/202	197/8536	0.0441693143425979	0.0535928302581082	0.00972646647152598	ACTB/ACTG1/MYL10/MYL12A/MYL12B/MYL2/MYL5/MYL7/MYL9	9	0.0456852791878173
147	Organismal Systems	Immune system	hsa04640	Hematopoietic cell lineage	8/202	100/8536	0.00247559874829136	0.00341868398573569	0.000620450814108112	ITGA1/ITGA2/ITGA2B/ITGA3/ITGA4/ITGA5/ITGA6/ITGB3	8	0.08
157	Cellular Processes	Cell growth and death	hsa04114	Oocyte meiosis	8/202	139/8536	0.0172120039089985	0.0222550114237369	0.00403902203697585	IGF1/IGF1R/MAP2K1/MAPK1/MAPK3/PPP1CA/PPP1CB/PPP1CC	8	0.0575539568345324
161	Organismal Systems	Nervous system	hsa04723	Retrograde endocannabinoid signaling	8/202	149/8536	0.0249678181736496	0.0314811620450365	0.00571345953630427	MAPK1/MAPK10/MAPK3/MAPK8/MAPK9/PRKCA/PRKCB/PRKCG	8	0.0536912751677852
162	Environmental Information Processing	Signaling molecules and interaction	hsa04514	Cell adhesion molecules	8/202	158/8536	0.0337981525267671	0.0423520059440354	0.00768638946352729	ITGA4/ITGA6/ITGA8/ITGA9/ITGAV/ITGB1/ITGB7/ITGB8	8	0.0506329113924051
163	Cellular Processes	Cell growth and death	hsa04217	Necroptosis	8/202	159/8536	0.03489525024227	0.0434585018354651	0.00788720541478495	BCL2/BIRC2/BIRC3/CAPN2/MAPK10/MAPK8/MAPK9/XIAP	8	0.050314465408805
124	Cellular Processes	Cell growth and death	hsa04215	Apoptosis - multiple species	7/202	32/8536	7.62793798188456e-06	1.24876726638917e-05	2.26636527475348e-06	BCL2/BIRC2/BIRC3/MAPK10/MAPK8/MAPK9/XIAP	7	0.21875
129	Human Diseases	Cancer: specific types	hsa05216	Thyroid cancer	7/202	37/8536	2.11038098106697e-05	3.32098712524492e-05	6.02719986432835e-06	BRAF/CCND1/CTNNB1/HRAS/MAP2K1/MAPK1/MAPK3	7	0.189189189189189
138	Human Diseases	Infectious disease: parasitic	hsa05144	Malaria	7/202	50/8536	0.000157809657486851	0.000232140293259643	4.21307247295177e-05	COMP/HGF/MET/THBS1/THBS2/THBS3/THBS4	7	0.14
143	Human Diseases	Substance dependence	hsa05031	Amphetamine addiction	7/202	69/8536	0.00116710014968969	0.00165679252018886	0.00030068829767493	JUN/PPP1CA/PPP1CB/PPP1CC/PRKCA/PRKCB/PRKCG	7	0.101449275362319
145	Metabolism	Carbohydrate metabolism	hsa00562	Inositol phosphate metabolism	7/202	73/8536	0.00162791474422244	0.00227908064191142	0.000413626250800621	PIK3CA/PIK3CB/PIK3CD/PIP5K1A/PIP5K1B/PIP5K1C/PTEN	7	0.0958904109589041
146	Cellular Processes	Cell growth and death	hsa04115	p53 signaling pathway	7/202	75/8536	0.00190591035631358	0.00264999864610724	0.000480943492941422	BCL2/CCND1/CCND2/CCND3/IGF1/PTEN/THBS1	7	0.0933333333333333
148	Human Diseases	Infectious disease: parasitic	hsa05140	Leishmaniasis	7/202	79/8536	0.00257126997677804	0.00352680949517528	0.000640074318543609	ELK1/ITGA4/ITGB1/JUN/MAPK1/MAPK3/PRKCB	7	0.0886075949367089
154	Organismal Systems	Immune system	hsa04657	IL-17 signaling pathway	7/202	95/8536	0.00714501117467551	0.00941842382116317	0.00170933281690802	GSK3B/JUN/MAPK1/MAPK10/MAPK3/MAPK8/MAPK9	7	0.0736842105263158
156	Organismal Systems	Digestive system	hsa04972	Pancreatic secretion	7/202	106/8536	0.0126929699247632	0.0165171339405573	0.00299766496198861	PRKCA/PRKCB/PRKCG/RAC1/RAP1A/RAP1B/RHOA	7	0.0660377358490566
151	Organismal Systems	Endocrine system	hsa04920	Adipocytokine signaling pathway	6/202	70/8536	0.00607870066430188	0.00817202804538597	0.0014831266870029	AKT1/AKT2/AKT3/MAPK10/MAPK8/MAPK9	6	0.0857142857142857
160	Organismal Systems	Immune system	hsa04658	Th1 and Th2 cell differentiation	6/202	93/8536	0.0226676150977977	0.0287595366553308	0.0052195166343613	JUN/MAPK1/MAPK10/MAPK3/MAPK8/MAPK9	6	0.0645161290322581
165	Cellular Processes	Transport and catabolism	hsa04137	Mitophagy - animal	6/202	105/8536	0.0380395900779494	0.0468002229443862	0.00849368837466175	HRAS/JUN/MAPK10/MAPK8/MAPK9/SRC	6	0.0571428571428571
168	Organismal Systems	Immune system	hsa04659	Th17 cell differentiation	6/202	109/8536	0.0443526871101585	0.0535928302581082	0.00972646647152598	JUN/MAPK1/MAPK10/MAPK3/MAPK8/MAPK9	6	0.055045871559633
155	Human Diseases	Infectious disease: parasitic	hsa05143	African trypanosomiasis	4/202	37/8536	0.01091798569906	0.0142990393348979	0.00259510695733174	LAMA4/PRKCA/PRKCB/PRKCG	4	0.108108108108108
166	Environmental Information Processing	Signal transduction	hsa04340	Hedgehog signaling pathway	4/202	56/8536	0.0430239130177156	0.0526135803770859	0.00954874417007004	BCL2/CCND1/CCND2/GSK3B	4	0.0714285714285714
141	Genetic Information Processing	Information processing in viruses	hsa03271	Virion - Rotavirus	2/202	2/8536	0.00055730057994838	0.000802354735670362	0.000145617919359412	ITGA2/ITGB1	2	1
158	Genetic Information Processing	Information processing in viruses	hsa03266	Virion - Herpesvirus	2/202	9/8536	0.0179802621448317	0.0231012228822838	0.00419259943417129	ITGA5/ITGB3	2	0.222222222222222
